# Supplementary material
Source: publisher figshare collection journal article supplement (https://karger.figshare.com/ndownloader/files/17708420)
Supplement: Supplementary file 1 [file 17708420]

**Table S1. cfDNA testing at Visit 1 and 2**

**
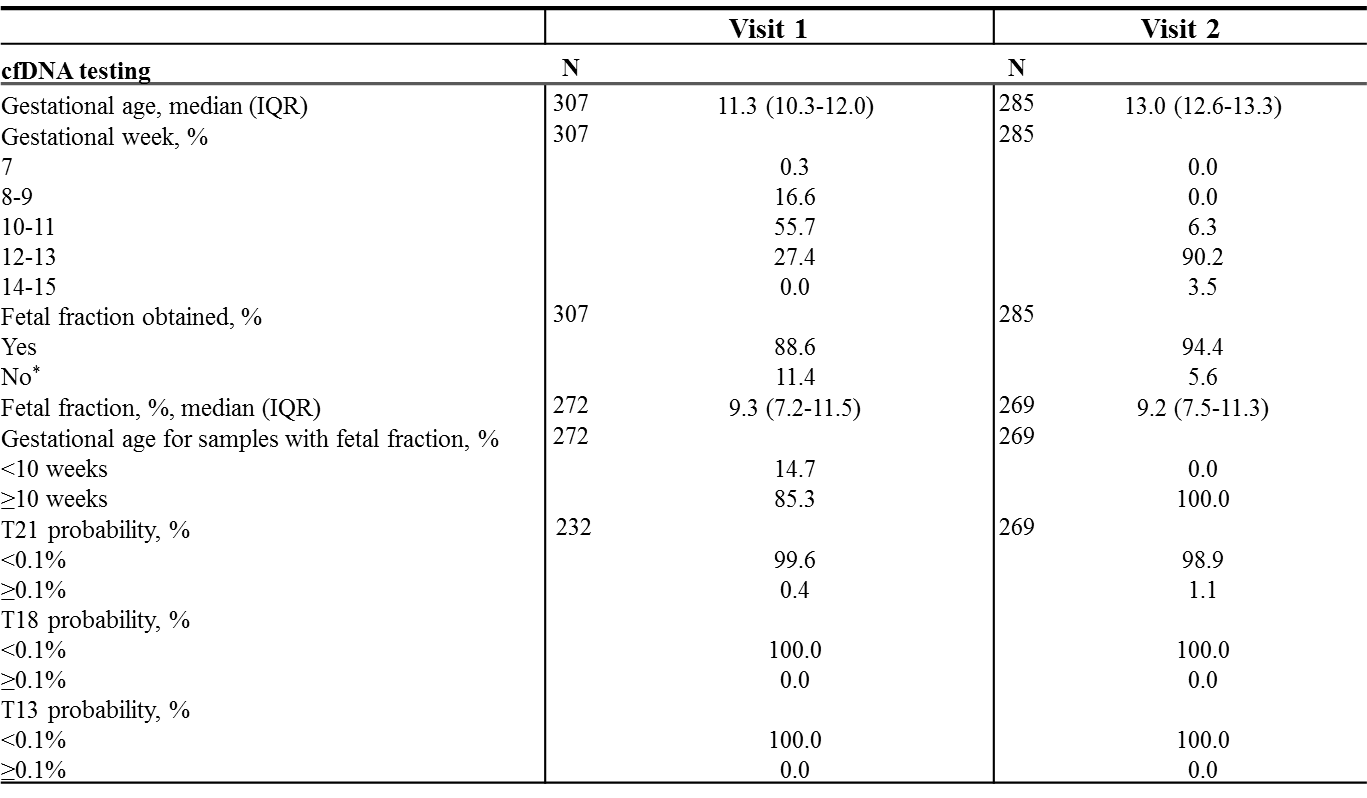
**

Table includes samples collected at Visit 1 and 2 from women with a live singleton fetus at the first trimester ultrasound examination (n=309). *Fetal fraction <4% in 10 samples (7 at Visit 1 and 3 at Visit 2).
